# Supplementary material for: Integrated clinicopathological and mutational profiling accumulates histological characteristics of rare and conventional colorectal cancer in Indian patients
Source: Research Square preprint supplement (doi:10.21203/rs.3.rs-6349107/v1), 2025-05-14
Supplement: Supplementary file 1 [file 143a04c209c3f0752ae2a7e7.docx]

Supplementary Table2: Clinical significance of variants

| **Mucinous Adenocarcinoma** | | | | |
| --- | --- | --- | --- | --- |
| **Tumor P62** | |  | **Tumor P71** | |
| Gene | variant ID | Gene | variant ID |
| APC | rs121913333;COSV57320538 | ARID1A | rs1485978447;COSV61371609 |
| NKX2-5 | rs72554028 | GPSM2 | rs755804651 |
| SLC4A1 | rs571740084 | MSTO1 | rs749922789;COSV55471710 |
| ASPM | rs143931757 | TMCO1 | rs201213306;COSV63317552 |
|  | | ASPM | rs753406334;COSV54125634 |
| MSH2 | rs63751411;COSV51876952 |
| FBXO11 | COSV99316041 |
| **Tumor P132** | | XPO1 | rs1057520009;COSV68944533 |
| Gene | variant ID | TBR1 | COSV67417618 |
| GFM1 | rs201408725 | TTN | rs762271078;COSV59941796 |
| FBXW7 | rs867384286;COSV55891008 | UNC80 | rs940057866;COSV55887893 |
| NEK1 | rs775849720 | TGFBR2 | rs104893819;COSV55443391 |
| ZSWIM6 | rs1554041295;COSV99404428 | PIK3CA | rs121913287;COSV55874568 |
| SGCD | COSV99047762 | CC2D2A | rs781252161;COSV104432586 |
| MMUT | rs765284825;COSV99222427 | MMAA | rs104893851;COSV55580062 |
| PTCH1 | novel | TRAPPC11 | rs140403642;COSV58217399 |
| PAX2 | rs75462234 | RASA1 | novel |
| BAG3 | rs727502897 | APC | rs1554084512;COSV57334177 |
| LTBP3 | rs752375653 | APC | COSV57330105 |
| INPPL1 | rs749079348 | SPINK5 | rs753621591;COSV56252267 |
| WBP11 | rs1949866551 | DNAH8 | rs776176679 |
| CEP290 | rs587783017 | PRPH2 | novel |
| TBX5 | rs1064795870 | SYNE1 | rs752224921;COSV54909299 |
| HNF1A | rs1593060859 | SAMD9 | rs1186536794;COSV66076161 |
| SACS | rs767871841 | CFTR | rs121909012;COSV99135243 |
| BRCA2 | rs80359479 | RP1 | rs997085898;COSV55114681 |
| SPART | rs770560051 | SMPD1 | rs755160837;COSV54966551 |
| CNGB1 | rs1429797650 | CTNND1 | COSV62387156 |
| AXIN2 | rs267606674 | ALG8 | rs533704173;COSV55202506 |
| SLC4A11 | novel | EIF2AK4 | rs587777207 |
| IQSEC2 | rs782660318 | BRD7 | rs796065051;COSV54264750 |
| OPHN1 | rs886044499 | TP53 | rs397516436;COSV52665560 |
|  | | NF1 | rs1597708728;COSV62204483 |
| NF1 | rs786202457;COSV62193225 |
| SLC4A1 | rs373916826 |
| DSG4 | rs1568062215 |
| NPHS1 | rs200905486;COSV62289502 |
| SCAF4 | COSV99741988 |
| HLCS | rs773398782 |
| IL1RAPL1 | rs781674023;COSV56234144 |
| F9 | rs137852261;COSV54378604 |
| **Signet Ring Cell Carcinoma** | | | | |
| **Tumor P96** | |  | **Tumor P153** | |
| Gene | variant ID | Gene | variant ID |
| B3GALT6 | rs533071750 | RPE65 | rs746127684 |
| P3H1 | rs752671524 | CTSK | rs764168526 |
| RPE65 | rs281865520 | SPTA1 | rs779537034;COSV63750467 |
| ALMS1 | rs1412574975 | TGFB2 | rs869312903 |
| UNC80 | rs1574855486 | MSH2 | rs1278858560 |
| SLC6A1 | novel | PRSS56 | rs730882064 |
| MSH3 | rs587776701 | TRIM71 | rs1575362239;COSV67471470 |
| TRDN | rs753514580 | SCN5A | rs1480085793 |
| CYP11B1 | rs1249087390 | GATA2 | novel |
| F2 | rs121918483;COSV105150814 | PHIP | COSV51501573 |
| ZMYM2 | rs753611080 | FIG4 | rs121908288 |
| RFXAP | rs1224857205 | CCN6 | rs781790231 |
| RPGRIP1L | rs751477523;COSV50905127 | RSPH4A | rs767646489;COSV105851407 |
| ANKRD11 | rs1597465118 | PUS7 | novel |
| NOTCH3 | rs762734007;COSV54633015 | COL5A1 | rs794727760 |
| RYR1 | rs749656679 | PDZD7 | rs587776894 |
| PNKP | novel | CTSD | rs752612332 |
| COL18A1 | rs749009747 | SYCP3 | rs761136347 |
| FGD1 | rs756586058 | TTLL5 | rs779740894;COSV54027701 |
|  | | FAH | rs1057517084 |
| **Tumor P101** | | ITGB4 | rs752657203 |
| Gene | variant ID | COL18A1 | rs768055690 |
| ABCG8 | NA | DMD | rs1557362198 |
| MSH6 | rs267608078 | CLCN5 | rs1933898062 |
| LARP7 | rs750946801 | F8 | rs387906460 |
| KIAA1109 | rs1367157719 |  | |
| KCNH2 | rs761863251 |
| NBN | rs1349928568 |
| GATA3 | rs771019738 |
| MYRF | rs769274302 |
| LTBP3 | rs752375653 |
| MFRP | rs1435204327 |
| COL2A1 | rs1273496827 |
| RB1 | rs587778862 |
| DUOX2 | rs774556391;COSV66531844 |
| MEOX1 | rs772798486;COSV59356507 |
| MCM3AP | rs763090302 |
| **(Stable Microsatellite) Coventional Adenocarcinoma** | | | | |
| **Tumor P115** | |  | **Tumor P140** | |
| Gene | variant ID | Gene | variant ID |
| APC | COSV57326134 | ARID1A | rs879255270;COSV61370535 |
| TP53 | rs587780067 | CPT2 | rs74315299 |
| MT-ND1 | rs199476143 | GJA8 | rs864309703;COSV53791343 |
|  | | FCGR1A, H2BC18, HIST2H2BF | rs74315310;COSV64985637 |
| **Tumor P120** | | GLI2 | rs1683184865;COSV58050823 |
| Gene | variant ID | RAB3GAP1 | rs766629205;COSV105822874 |
| APC | rs121913333;COSV57320538 | TTN | rs1553539995;COSV59918596 |
| APC | rs1554085654 | TTN | novel |
| MPDZ | rs571799365;COSV59952784 |  | TTN | rs748956593 |
|  | | TTN | novel |
| **Tumor P127** | | UNC80 | COSV55901307 |
| Gene | variant ID | TFG | rs764959531;COSV53749011 |
| SZT2 | rs1553154643;COSV65172908 | GATA2 | rs387906632;COSV62007611 |
| DOCK7 | rs1223056056 | CEP135 | rs186530606;COSV57258576 |
| ASPM | rs759485449 | PKD2 | rs121918040;COSV52937522 |
| ZEB2 | rs886041989;COSV57961628 | MTTP | rs1725366621 |
| TTN | rs750519430;COSV60279899 | PRLR | rs376188691;COSV51492949 |
| TTN | rs1553528016;COSV59881459 | NIPBL | rs1554032954 |
| TTN | rs869038795;COSV59999995 | PIK3R1 | rs1057520690;COSV57123475 |
| TMEM237 | rs902145121 | ADGRV1 | rs1236715896;COSV67978996 |
| IDH1 | rs121913499;COSV61615256 | APC | rs1554084512;COSV57334177 |
| FLNB | rs80356519;COSV55902127 | APC | rs730881247;COSV57362864 |
| ZBTB20 | rs1576220876 | DSP | rs1131691673;COSV65791931 |
| PIK3CA | rs121913287;COSV55874568 | DNAH8 | rs545867507;COSV59477930 |
| ADGRV1 | rs199806093 | RRAGD | novel |
| APC | rs121913332;COSV57321313 | FBXL4 | rs745512025;COSV57746231 |
| APC | rs768922431;COSV57327470 | ARID1B | rs1554238072;COSV51664922 |
| DNAH8 | rs369473998 | SAMD9 | rs1186536794;COSV66076161 |
| COL12A1 | rs1274606112 | KCND2 | rs750457269;COSV58578424 |
| PNLDC1 | rs200629089;COSV99277097 | CYP7B1 | rs866340497;COSV59582915 |
| MCPH1 | rs387906961;COSV100766054 | ARFGEF1 | rs1563869264 |
| TRPS1 | novel | TMEM67 | rs778155409;COSV105239692 |
| ERCC6 | rs768589918;COSV63388430 | GLDC | rs1554646529;COSV58685784 |
| USH1C | rs1290295453;COSV50015892 | COL5A1 | rs1564457102 |
| SCYL2 | rs760124743;COSV62570835 | CUBN | rs182512508;COSV64726399 |
| SACS | rs762947018 | BMPR1A | rs587782400;COSV64404910 |
| BRCA2 | rs80358435 | ANO5 | rs1488095558;COSV61086738 |
| GATM | rs1566842679 | ALG8 | rs533704173;COSV55202506 |
| FBN1 | rs794728251;COSV57318600 | ATM | rs762083530;COSV53726137 |
| SALL1 | rs864321635;COSV51759482 | TTC12 | rs201244916;COSV59098698 |
| MLYCD | rs759043861 | CLMP | rs587776965;COSV71650019 |
| STRADA | rs1387899682 | IPO8 | rs1160566841 |
| NPC1 | rs483352891 | KMT2D | rs398123728;COSV56407525 |
| FERMT1 | rs765716291;COSV54095691 | SCN8A | rs867660463;COSV61976784 |
| CHRNA4 | rs281865068;COSV64719406 | CEP290 | novel |
| PI4KA | novel | TMTC3 | rs768546704;COSV99898398 |
| KDM6A | rs2044403163;COSV65038641 | GNPTAB | rs281864982;COSV54779098 |
| BRWD3 | COSV64751457 | POLE | rs1057519943;COSV57673247 |
|  | | POMT2 | rs773017813;COSV55072814 |
| **Tumor P129** | | GALC | rs750524447;COSV99728750 |
| Gene | variant ID | GALC | novel |
| HERC1 | rs757749585;COSV71248690 | GATM | rs775933965;COSV67540600 |
| TP53 | rs1057519986;COSV52661272 | FBN1 | rs763091520;COSV100355439 |
|  | | VPS13C | novel |
| **Tumor P130** | | SMAD6 | novel |
| Gene | variant ID | TSC2 | COSV54594624 |
| SCN1A | rs398123585;COSV57667669 | NF1 | rs137854560;COSV62191433 |
|  | | NF1 | rs786202457;COSV62193225 |
| **Tumor P152** | | PSMD12 | rs895130488;COSV62066198 |
| Gene | variant ID | ASXL3 | rs2067601254 |
| STAT2 | COSV58474875 |  | DYM | rs780873164;COSV53981860 |
| TP53 | rs121913344;COSV52662281 | DOCK6 | rs369389970 |
|  | | ASXL1 | rs1179121574;COSV60107477 |
| **Tumor P162** | | COL6A2 | rs749593004 |
| Gene | variant ID | CDC45 | rs540900837;COSV54243701 |
| ABCC8 | rs781090024 | DMD | rs398124036;COSV58958626 |
| TP53 | rs121913344;COSV52662281 | CYBB | rs886041192;COSV66085069 |
|  | | CUL4B | rs905353542;COSV60689694 |
| **Tumor P168** | |  | |
| Gene | variant ID |
| APC | COSV104567789 |
| SMAD4 | rs377767334 |
|  |  |  |  |
| **(Unstable Microsatellite) Coventional Adenocarcinoma** | | | | |
| **Tumor P99** | |  | **Tumor P122** | |
| Gene | variant ID | Gene | variant ID |
| CLCNKB | rs370221310 | PARK7 | rs759703272 |
| SZT2 | rs397515489 | SF3B4 | rs387907186 |
| XPO1 | rs1057520009;COSV68944533 | CRB1 | rs1659645978 |
| GLI2 | rs1683184865;COSV58050823 | CD46 | rs202071781 |
| SCN1A | rs141188608;COSV57665921 | ALMS1 | rs1671883598;COSV100044063 |
| TTN | rs869312055;COSV59955046 | COL4A3 | rs1308023279 |
| CPS1 | rs758724746;COSV51807292 | MLH1 | novel |
| MANBA | rs121434335;COSV99898471 | PROS1 | rs780863931;COSV67775511 |
| CFI | rs759676430;COSV67097984 | CPLANE1 | novel |
| NIPBL | rs797045769;COSV56944290 | KMT2E | rs1584803745;COSV57577290 |
| PIK3R1 | rs1057520690;COSV57123475 | CHST3 | rs769540174 |
| PIK3R1 | rs1057519839;COSV57123942 | INPPL1 | novel |
| MSH3 | rs1749541157;COSV54144555 | FBN1 | rs727503057;COSV57315655 |
| APC | rs587779783;COSV57322578 | POLG | rs1447799185 |
| APC | rs121913332;COSV57321313 | NF1 | rs876657714;COSV62196320 |
| SH3TC2 | rs1580917130 | DMD | rs863225011 |
| DSP | rs1131691673;COSV65791931 |  | |
| SERAC1 | rs1220930025 | **Tumor P124** | |
| DNAH11 | rs766759197;COSV60975865 | Gene | variant ID |
| GLDC | rs1554646529;COSV58685784 | BCL11A | rs768799046 |
| TSC1 | COSV53770233 | HIBCH | rs767597690 |
| ODAD2 | rs752348839;COSV59458741 | COLQ | rs185829251 |
| CHD4 | COSV58893614 | MSH3 | rs587776701 |
| KMT2D | rs727503983;COSV56427366 | PAX6 | rs1057517785;COSV99570800 |
| BBS10 | rs553291328;COSV99674826 | ROGDI | rs1060502981 |
| PPP1R12A | rs1356631664 | PRRT2 | rs1900111672 |
| POLE | rs1057519943;COSV57673247 | ZMYND15 | novel |
| BRCA2 | rs397507646;COSV66461936 | SLC7A9 | rs779653925 |
| ANKRD11 | novel | SLC4A11 | novel |
| NF1 | rs786202457;COSV62193225 | PIGT | rs760395465 |
| CACNA1A | rs886042230;COSV64194925 | CTSA | rs758642867 |
|  | |  |  |
| **Tumor P143** | | **Tumor P149** | |
| Gene | variant ID | Gene | variant ID |
| LMBRD2 | rs1743709062 | NTRK1 | rs750168062;COSV62325676 |
| ACTB | COSV100079717 | TTC7A | rs876657393 |
| ESCO2 | rs80359852 | PTCD3 | rs1301547272 |
| EBF3 | rs1589745620 |  | TTN | novel |
| CTSD | rs752612332 | TGFBR2 | rs727504421;COSV55448438 |
| INPPL1 | novel | GLB1 | rs794729217 |
| ATM | rs587782558 | COL7A1 | novel |
| NPRL3 | COSV67854861 | FBXW7 | rs759610249;COSV55905466 |
| ANKRD11 | rs878855327 | TRIO | rs746654944 |
| MYO15A | rs772536599 | NIPBL | rs1157335847 |
| RNF43 | rs755128667 | CPLANE1 | novel |
| KCNJ2 | rs199473373;COSV54664479 | RICTOR | rs1554059320 |
| SMAD4 | novel | COL1A2 | rs67162110;COSV51952887 |
| CPAMD8 | rs756064750 | KCNH2 | rs794728455 |
| AMER1 | rs1930251154;COSV57655167 | SLC39A14 | rs774860376;COSV105004529 |
|  | | PIGO | rs760848629 |
| **Tumor P159** | | ERBB3 | rs1057519893;COSV57246465 |
| Gene | variant ID | GLI1 | rs748321474;COSV105849134 |
| LDLRAP1 | rs2044386296;COSV65473126 | KMT2B | rs754806477 |
| AHDC1 | rs749294057 | NPHS1 | rs386833935 |
| PCCB | rs786200983 | SCAF4 | NA |
| DOK7 | rs606231132 | MCM3AP | rs763090302 |
| CNGA1 | rs772867912 | MORC2 | COSV99310668 |
| OPLAH | rs781956288 | IDS | rs193302912;COSV61712084 |
| MEN1 | rs767319284 |  | |
| MFRP | rs587776596 | **Tumor P50** | |
| FBN1 | rs2043568077 | Gene | variant ID |
| CDH1 | rs864622655 | PLOD1 | rs121913554 |
| ERBB2 | rs1057519738;COSV54062791 | KCNH1 | rs1553344875 |
| DSG2 | rs1375081885 | MSH6 | rs267608078 |
|  | | UNC80 | rs751900819;COSV55891885 |
| **Tumor P187T1** | | DHX30 ,MIR1226 | rs753242774;COSV53136286 |
| Gene | variant ID | EVC2 | novel |
| ABCA4 | rs281865377 | HSD17B4 | rs1231357043 |
| WDR26 | rs1673323181 | ADAMTS19 | rs780595297;COSV50752386 |
| PRSS56 | rs730882064 | FANCE | rs745877509;COSV57691438 |
| DTYMK | rs887888951;COSV59871269 | CFTR | rs121908800 |
| PIK3CA | rs1057519940;COSV55883555 | KCNH2 | rs761863251 |
| APC | rs137854580;COSV57322064 | PIGO | rs1391418639 |
| APC | rs121913332;COSV57321313 | ECHS1 | rs758723288;COSV100881914 |
| FANCE | rs587778337 | PAX6 | rs1357628990 |
| NPR2 | rs1828094222;COSV100709199 | KMT2D | rs727503983;COSV56427366 |
| MRE11 | rs780001540 | FBN1 | rs1597553721 |
| ATP7B | rs137853287 | TCF12 | rs760718747;COSV51005359 |
| CHD8 | rs1555314317 | FANCA | rs751572448 |
| SALL1 | rs780221020 | PAFAH1B1 | rs113994198 |
| CTCF | rs886041997 | DLG4 | rs1227093654;COSV100263350 |
| ALOX12B | rs746723399 | RAI1 | rs750728463 |
| MICOS13 | rs751944867 | STAT5B | rs761761205 |
| RYR1 | rs193922815 | DNAAF3 | rs756430359 |
| ALG12 | rs770711819 | BMP2 | rs1600173184 |
| DMD | rs398124008 | ADSL | rs750614500 |
| WDR45 | rs1557083830 | BCOR | rs121434619;COSV60709955 |
|  | | KDM5C | rs146232504;COSV62890864 |
| MED12 | COSV61332408 |
| **Tumor P187T2** | |  | GJB1 | rs1241595912;COSV62139915 |
| Gene | variant ID |  | |
| NCSTN | rs1266104510 | **Tumor P91** | |
| KIF14 | rs774318019 | Gene | variant ID |
| TGFB2 | rs863223796 | B3GALT6 | rs533071750 |
| PPP1R21 | novel | AGL | rs745757264 |
| CYP26B1 | rs756077143 | AGL ,LOC124904230 | rs786204655 |
| BARD1 | rs587780033 | SASS6 | rs763290832 |
| BRPF1 | rs762904815 | FLG | rs146686141;COSV64240354 |
| CPLANE1 | rs775263897 | LMNA | novel |
| MSH3 | rs587776701 | IRF6 | rs1553248641;COSV65419612 |
| TRDN | rs757805966 | ACTA1 | rs1057519311 |
| ARID1B | rs1554294674 | PCARE | rs770881706 |
| RNF216 | rs1335215379 | MSH6 | rs267608078 |
| STAR | rs104894090 | NPHP1 | rs766524637 |
| THAP1 | rs1802672249 | ABCA12 | rs387906285 |
| RP1 | rs781249059 | DIS3L2 | rs748001988;COSV99807050 |
| GLDC | rs121964980;COSV58676016 | COL6A3 | rs398124119;COSV104601030 |
| PIGO | rs770591449 | COL7A1 | rs780623622 |
| CAPN1 | rs1033093801 | BAP1 | NA |
| CEP290 | rs769091629 | LARP7 ,MIR302A ,MIR302B ,MIR302C ,MIR302D ,MIR367 ,MIR302CHG | rs750946801 |
| SACS | rs770866403 | FBXW7 | rs149680468;COSV55891274 |
| BRCA2 | rs81002798 | DNAH5 | novel |
| IVD | rs1237032588;COSV51100066 | MSH3 | rs587776701 |
| IDH3A | rs770798851;COSV51910187 | AHI1 | rs753874898 |
| TBX6 | rs758051786 | KCTD7 | rs984651812;COSV99299244 |
| HSD3B7 | rs786200876 | NCF1 | rs119103270 |
| STAT5B | rs761761205 | KRIT1 | rs776245507 |
| BPTF | rs753044214 | SLC26A4 | rs918684449 |
| ATP8B1 | rs761784230 | MCPH1 | rs759663956 |
| SLC4A11 | novel | DOCK8 | rs748134881 |
| SHROOM2 | rs138558321 | PIGO | rs770591449 |
| MTM1 | rs797044504 | PIGO | rs760848629 |
|  | | FKTN | rs398123555 |
| KCNQ1 | rs397508068 |
| DDB2 | rs121434641 |
| TNFRSF1A | rs876661031 |
| WNT10B | rs763991433;COSV99975995 |
| GJB2 | rs371024165;COSV67010543 |
| NBEA | rs763376147 |
| CHD8 | rs1439223724;COSV67870139 |
| MYH7 | rs397516265;COSV105912886 |
| ACTN1 | rs1594760140 |
|  | | | DYNC1H1 | COSV64140215 |
| EIF2AK4 | rs587777107 |
| XYLT2 | rs779864368 |
| RNF43 | rs755128667 |
| BPTF | rs753044214 |
| SGSH | rs529855742 |
| STK11 | rs886041996 |
| STK11 | rs121913321 |
| GDF1, CERS1 | rs2055936732 |
| KMT2B | rs1555734923;COSV53073648 |
| PPP2R1A | rs1057519946;COSV59042187 |
| KCNB1 | rs1555889162 |
| TRIOBP | rs756145453 |
