# Supplementary material for: Integrated clinicopathological and mutational profiling accumulates histological characteristics of rare and conventional colorectal cancer in Indian patients
Source: Research Square preprint supplement (doi:10.21203/rs.3.rs-6349107/v1), 2025-05-14
Supplement: Supplementary file 2 [file 57625bf6327de9b60aeaf2a5.docx]

Supplementary Table 5: Genesets predicted for rare tumors

|  | Gene_combination | P_value | hr | WT | Mutant |
| --- | --- | --- | --- | --- | --- |
| 1 | MUC19_DNHD1 | 0.352 | 0.468 | 6 | 6 |
| 2 | MUC5B_DNHD1 | 0.352 | 0.468 | 6 | 6 |
| 3 | TTN_ARID1A | 0.402 | 1.79 | 7 | 5 |
| 4 | TTN_PRKDC | 0.402 | 1.79 | 7 | 5 |
| 5 | TTN_MYCBP2 | 0.402 | 1.79 | 7 | 5 |
| 6 | TTN_BIRC6 | 0.402 | 1.79 | 7 | 5 |
| 7 | TTN_SMC2 | 0.402 | 1.79 | 7 | 5 |
| 8 | MUC19_ARID1A | 0.402 | 1.79 | 7 | 5 |
| 9 | MUC19_PRKDC | 0.402 | 1.79 | 7 | 5 |
| 10 | MUC19_MYCBP2 | 0.402 | 1.79 | 7 | 5 |
| 11 | MUC19_BIRC6 | 0.402 | 1.79 | 7 | 5 |
| 12 | MUC19_SMC2 | 0.402 | 1.79 | 7 | 5 |
| 13 | MUC5B_ARID1A | 0.402 | 1.79 | 7 | 5 |
| 14 | MUC5B_PRKDC | 0.402 | 1.79 | 7 | 5 |
| 15 | MUC5B_MYCBP2 | 0.402 | 1.79 | 7 | 5 |
| 16 | MUC5B_BIRC6 | 0.402 | 1.79 | 7 | 5 |
| 17 | MUC5B_SMC2 | 0.402 | 1.79 | 7 | 5 |
| 18 | ARID1A_PRKDC | 0.402 | 1.79 | 7 | 5 |
| 19 | ARID1A_MYCBP2 | 0.402 | 1.79 | 7 | 5 |
| 20 | ARID1A_BIRC6 | 0.402 | 1.79 | 7 | 5 |
| 21 | ARID1A_SMC2 | 0.402 | 1.79 | 7 | 5 |
| 22 | PRKDC_MYCBP2 | 0.402 | 1.79 | 7 | 5 |
| 23 | PRKDC_BIRC6 | 0.402 | 1.79 | 7 | 5 |
| 24 | PRKDC_SMC2 | 0.402 | 1.79 | 7 | 5 |
| 25 | MYCBP2_BIRC6 | 0.402 | 1.79 | 7 | 5 |
| 26 | MYCBP2_SMC2 | 0.402 | 1.79 | 7 | 5 |
| 27 | BIRC6_SMC2 | 0.402 | 1.79 | 7 | 5 |
| 28 | TTN_DNHD1 | 0.428 | 0.514 | 7 | 5 |
| 29 | TTN_SYNE1 | 0.428 | 0.514 | 7 | 5 |
| 30 | TTN_CRYBG3 | 0.428 | 0.514 | 7 | 5 |
| 31 | TTN_STAB1 | 0.428 | 0.514 | 7 | 5 |
| 32 | TTN_ALMS1 | 0.428 | 0.514 | 7 | 5 |
| 33 | MUC19_SYNE1 | 0.428 | 0.514 | 7 | 5 |
| 34 | MUC19_CRYBG3 | 0.428 | 0.514 | 7 | 5 |
| 35 | MUC19_STAB1 | 0.428 | 0.514 | 7 | 5 |
| 36 | MUC19_ALMS1 | 0.428 | 0.514 | 7 | 5 |
| 37 | MUC5B_SYNE1 | 0.428 | 0.514 | 7 | 5 |
| 38 | MUC5B_CRYBG3 | 0.428 | 0.514 | 7 | 5 |
| 39 | MUC5B_STAB1 | 0.428 | 0.514 | 7 | 5 |
| 40 | MUC5B_ALMS1 | 0.428 | 0.514 | 7 | 5 |
| 41 | DNHD1_SYNE1 | 0.428 | 0.514 | 7 | 5 |
| 42 | DNHD1_CRYBG3 | 0.428 | 0.514 | 7 | 5 |
| 43 | DNHD1_STAB1 | 0.428 | 0.514 | 7 | 5 |
| 44 | DNHD1_ALMS1 | 0.428 | 0.514 | 7 | 5 |
| 45 | SYNE1_CRYBG3 | 0.428 | 0.514 | 7 | 5 |
| 46 | SYNE1_STAB1 | 0.428 | 0.514 | 7 | 5 |
| 47 | SYNE1_ALMS1 | 0.428 | 0.514 | 7 | 5 |
| 48 | CRYBG3_STAB1 | 0.428 | 0.514 | 7 | 5 |
| 49 | CRYBG3_ALMS1 | 0.428 | 0.514 | 7 | 5 |
| 50 | STAB1_ALMS1 | 0.428 | 0.514 | 7 | 5 |
| 51 | TTN_ZFHX4 | 0.47 | 0.538 | 7 | 5 |
| 52 | TTN_CACNA1H | 0.47 | 0.538 | 7 | 5 |
| 53 | TTN_ZNF804B | 0.47 | 0.538 | 7 | 5 |
| 54 | TTN_SMC4 | 0.47 | 0.538 | 7 | 5 |
| 55 | MUC19_MUC16 | 0.47 | 0.538 | 7 | 5 |
| 56 | MUC19_ZFHX4 | 0.47 | 0.538 | 7 | 5 |
| 57 | MUC19_CACNA1H | 0.47 | 0.538 | 7 | 5 |
| 58 | MUC19_ZNF804B | 0.47 | 0.538 | 7 | 5 |
| 59 | MUC19_SMC4 | 0.47 | 0.538 | 7 | 5 |
| 60 | MUC5B_MUC16 | 0.47 | 0.538 | 7 | 5 |
| 61 | MUC5B_ZFHX4 | 0.47 | 0.538 | 7 | 5 |
| 62 | MUC5B_CACNA1H | 0.47 | 0.538 | 7 | 5 |
| 63 | MUC5B_ZNF804B | 0.47 | 0.538 | 7 | 5 |
| 64 | MUC5B_SMC4 | 0.47 | 0.538 | 7 | 5 |
| 65 | MUC16_ZFHX4 | 0.47 | 0.538 | 7 | 5 |
| 66 | MUC16_CACNA1H | 0.47 | 0.538 | 7 | 5 |
| 67 | MUC16_ZNF804B | 0.47 | 0.538 | 7 | 5 |
| 68 | MUC16_SMC4 | 0.47 | 0.538 | 7 | 5 |
| 69 | ZFHX4_CACNA1H | 0.47 | 0.538 | 7 | 5 |
| 70 | ZFHX4_ZNF804B | 0.47 | 0.538 | 7 | 5 |
| 71 | ZFHX4_SMC4 | 0.47 | 0.538 | 7 | 5 |
| 72 | CACNA1H_ZNF804B | 0.47 | 0.538 | 7 | 5 |
| 73 | CACNA1H_SMC4 | 0.47 | 0.538 | 7 | 5 |
| 74 | ZNF804B_SMC4 | 0.47 | 0.538 | 7 | 5 |
| 75 | MUC19_SHANK1 | 0.583 | 1.46 | 7 | 5 |
| 76 | MUC5B_SHANK1 | 0.583 | 1.46 | 7 | 5 |
| 77 | TTN_MICAL3 | 0.824 | 0.809 | 7 | 5 |
| 78 | TTN_TENM2 | 0.824 | 0.809 | 7 | 5 |
| 79 | TTN_MGA | 0.824 | 0.809 | 7 | 5 |
| 80 | TTN_UBR5 | 0.824 | 0.809 | 7 | 5 |
| 81 | TTN_ARHGEF40 | 0.824 | 0.809 | 7 | 5 |
| 82 | MUC19_MICAL3 | 0.824 | 0.809 | 7 | 5 |
| 83 | MUC19_TENM2 | 0.824 | 0.809 | 7 | 5 |
| 84 | MUC19_MGA | 0.824 | 0.809 | 7 | 5 |
| 85 | MUC19_UBR5 | 0.824 | 0.809 | 7 | 5 |
| 86 | MUC19_ARHGEF40 | 0.824 | 0.809 | 7 | 5 |
| 87 | MUC5B_MICAL3 | 0.824 | 0.809 | 7 | 5 |
| 88 | MUC5B_TENM2 | 0.824 | 0.809 | 7 | 5 |
| 89 | MUC5B_MGA | 0.824 | 0.809 | 7 | 5 |
| 90 | MUC5B_UBR5 | 0.824 | 0.809 | 7 | 5 |
| 91 | MUC5B_ARHGEF40 | 0.824 | 0.809 | 7 | 5 |
| 92 | MICAL3_TENM2 | 0.824 | 0.809 | 7 | 5 |
| 93 | MICAL3_MGA | 0.824 | 0.809 | 7 | 5 |
| 94 | MICAL3_UBR5 | 0.824 | 0.809 | 7 | 5 |
| 95 | MICAL3_ARHGEF40 | 0.824 | 0.809 | 7 | 5 |
| 96 | TENM2_MGA | 0.824 | 0.809 | 7 | 5 |
| 97 | TENM2_UBR5 | 0.824 | 0.809 | 7 | 5 |
| 98 | TENM2_ARHGEF40 | 0.824 | 0.809 | 7 | 5 |
| 99 | MGA_UBR5 | 0.824 | 0.809 | 7 | 5 |
| 100 | MGA_ARHGEF40 | 0.824 | 0.809 | 7 | 5 |
| 101 | UBR5_ARHGEF40 | 0.824 | 0.809 | 7 | 5 |
| 102 | MUC19_MUC5B | 0.847 | 0.814 | 5 | 7 |
| 103 | TTN_MUC16 | 0.878 | 0.838 | 6 | 6 |
| 104 | TTN_MUC19 | 0.959 | 0.906 | 6 | 6 |
| 105 | TTN_MUC5B | 0.959 | 0.906 | 6 | 6 |
| 106 | TTN_KMT2D | 0.966 | 0.99 | 7 | 5 |
| 107 | MUC19_KMT2D | 0.966 | 0.99 | 7 | 5 |
| 108 | MUC5B_KMT2D | 0.966 | 0.99 | 7 | 5 |
