# Supplementary material for: Integrated clinicopathological and mutational profiling accumulates histological characteristics of rare and conventional colorectal cancer in Indian patients
Source: Research Square preprint supplement (doi:10.21203/rs.3.rs-6349107/v1), 2025-05-14
Supplement: Supplementary file 3 [file 7f71c266d187e13b3052337f.docx]

Supplementary Table 4: Genesets predicted for conventional tumors

|  | Gene_combination | P_value | hr | WT | Mutant |
| --- | --- | --- | --- | --- | --- |
| 1 | DNAH5_DYNC2H1 | 0.0116 | 3.8 | 15 | 8 |
| 2 | DNAH5_CIT | 0.015 | 3.66 | 15 | 8 |
| 3 | DNAH5_TNRC18 | 0.034 | 2.99 | 16 | 7 |
| 4 | TTN_DNAH5 | 0.0423 | 2.83 | 13 | 10 |
| 5 | OBSCN_DNAH5 | 0.101 | 2.29 | 14 | 9 |
| 6 | DNAH5_NEB | 0.101 | 2.29 | 14 | 9 |
| 7 | SYNE1_TNRC18 | 0.122 | 0.37 | 17 | 6 |
| 8 | DNAH5_HMCN1 | 0.126 | 2.3 | 17 | 6 |
| 9 | MUC16_DNAH5 | 0.164 | 2.07 | 12 | 11 |
| 10 | TTN_MUC16 | 0.165 | 2.23 | 10 | 13 |
| 11 | DNAH5_DST | 0.175 | 2 | 15 | 8 |
| 12 | DNAH5_CTNND2 | 0.175 | 2 | 15 | 8 |
| 13 | TTN_CIT | 0.178 | 2 | 13 | 10 |
| 14 | MUC16_CIT | 0.178 | 2 | 13 | 10 |
| 15 | OBSCN_CIT | 0.178 | 2 | 13 | 10 |
| 16 | FAT4_DNAH5 | 0.189 | 1.94 | 15 | 8 |
| 17 | DNAH5_RYR3 | 0.189 | 1.94 | 15 | 8 |
| 18 | TNRC18_CIT | 0.201 | 1.98 | 16 | 7 |
| 19 | RYR1_DNAH5 | 0.213 | 1.88 | 15 | 8 |
| 20 | TTN_DYNC2H1 | 0.241 | 1.83 | 14 | 9 |
| 21 | MUC16_DYNC2H1 | 0.241 | 1.83 | 14 | 9 |
| 22 | TTN_TNRC18 | 0.243 | 1.83 | 13 | 10 |
| 23 | MUC16_TNRC18 | 0.243 | 1.83 | 13 | 10 |
| 24 | DNAH11_LRP1B | 0.245 | 0.514 | 17 | 6 |
| 25 | RYR3_LRP1B | 0.245 | 0.514 | 17 | 6 |
| 26 | SYNE1_LRP1B | 0.257 | 0.538 | 16 | 7 |
| 27 | TNRC18_DYNC2H1 | 0.259 | 1.9 | 17 | 6 |
| 28 | APC_SYNE1 | 0.268 | 0.559 | 16 | 7 |
| 29 | NEB_CIT | 0.269 | 1.77 | 14 | 9 |
| 30 | DNAH5_MUC17 | 0.302 | 1.71 | 16 | 7 |
| 31 | TTN_OBSCN | 0.327 | 1.72 | 11 | 12 |
| 32 | MUC16_OBSCN | 0.327 | 1.72 | 11 | 12 |
| 33 | RYR1_CIT | 0.34 | 1.64 | 14 | 9 |
| 34 | SYNE1_ANK3 | 0.341 | 0.581 | 17 | 6 |
| 35 | DNAH11_ANK3 | 0.341 | 0.581 | 17 | 6 |
| 36 | DNAH5_PCLO | 0.358 | 1.6 | 16 | 7 |
| 37 | DNAH5_ANK3 | 0.358 | 1.6 | 16 | 7 |
| 38 | SYNE1_DST | 0.36 | 0.598 | 17 | 6 |
| 39 | SYNE1_CTNND2 | 0.36 | 0.598 | 17 | 6 |
| 40 | DST_DNAH11 | 0.36 | 0.598 | 17 | 6 |
| 41 | DNAH11_CTNND2 | 0.36 | 0.598 | 17 | 6 |
| 42 | NEB_LRP1B | 0.36 | 0.598 | 17 | 6 |
| 43 | CTNND2_LRP1B | 0.36 | 0.598 | 17 | 6 |
| 44 | DNAH5_MEGF8 | 0.384 | 1.58 | 16 | 7 |
| 45 | MUC17_LRP1B | 0.385 | 0.63 | 15 | 8 |
| 46 | TNRC18_LRP1B | 0.391 | 0.574 | 18 | 5 |
| 47 | FAT4_DNAH11 | 0.401 | 0.634 | 16 | 7 |
| 48 | SYNE1_PCLO | 0.401 | 0.634 | 16 | 7 |
| 49 | DNAH11_PCLO | 0.401 | 0.634 | 16 | 7 |
| 50 | DNAH5_DNAH11 | 0.407 | 1.54 | 16 | 7 |
| 51 | FAT4_SYNE1 | 0.412 | 0.646 | 15 | 8 |
| 52 | ADGRV1_LRP1B | 0.422 | 0.652 | 16 | 7 |
| 53 | MUC19_LRP1B | 0.422 | 0.652 | 16 | 7 |
| 54 | MEGF8_PCLO | 0.422 | 0.652 | 16 | 7 |
| 55 | PCLO_LRP1B | 0.422 | 0.652 | 16 | 7 |
| 56 | APC_DNAH5 | 0.431 | 1.56 | 16 | 7 |
| 57 | SYNE1_MUC17 | 0.434 | 0.665 | 15 | 8 |
| 58 | SYNE1_MEGF8 | 0.434 | 0.665 | 15 | 8 |
| 59 | OBSCN_DYNC2H1 | 0.438 | 1.51 | 15 | 8 |
| 60 | FAT4_DYNC2H1 | 0.438 | 1.51 | 15 | 8 |
| 61 | RYR3_CIT | 0.438 | 1.51 | 15 | 8 |
| 62 | NEB_DYNC2H1 | 0.438 | 1.51 | 15 | 8 |
| 63 | CIT_DYNC2H1 | 0.438 | 1.51 | 15 | 8 |
| 64 | DNAH5_SYNE2 | 0.446 | 1.49 | 16 | 7 |
| 65 | OBSCN_TNRC18 | 0.448 | 1.48 | 14 | 9 |
| 66 | MUC17_CIT | 0.466 | 1.47 | 15 | 8 |
| 67 | MUC17_PCLO | 0.507 | 0.701 | 16 | 7 |
| 68 | DST_CIT | 0.507 | 1.43 | 15 | 8 |
| 69 | TTN_FAT4 | 0.522 | 1.41 | 12 | 11 |
| 70 | MUC16_FAT4 | 0.522 | 1.41 | 12 | 11 |
| 71 | MEGF8_ANK3 | 0.523 | 0.714 | 16 | 7 |
| 72 | DST_LRP1B | 0.523 | 0.714 | 16 | 7 |
| 73 | LRP1B_ANK3 | 0.523 | 0.714 | 16 | 7 |
| 74 | TTN_NEB | 0.527 | 1.41 | 13 | 10 |
| 75 | MUC16_NEB | 0.527 | 1.41 | 13 | 10 |
| 76 | OBSCN_NEB | 0.527 | 1.41 | 13 | 10 |
| 77 | FAT4_CIT | 0.532 | 1.39 | 15 | 8 |
| 78 | ADGRV1_CIT | 0.532 | 1.4 | 15 | 8 |
| 79 | MUC19_CIT | 0.532 | 1.4 | 15 | 8 |
| 80 | CIT_ANK3 | 0.532 | 1.39 | 15 | 8 |
| 81 | MUC16_HMCN1 | 0.536 | 1.37 | 14 | 9 |
| 82 | OBSCN_HMCN1 | 0.536 | 1.37 | 14 | 9 |
| 83 | SYNE1_NEB | 0.552 | 0.731 | 16 | 7 |
| 84 | ADGRV1_ANK3 | 0.552 | 0.731 | 16 | 7 |
| 85 | MUC19_ANK3 | 0.552 | 0.731 | 16 | 7 |
| 86 | TTN_DST | 0.557 | 1.38 | 13 | 10 |
| 87 | MUC16_DST | 0.557 | 1.38 | 13 | 10 |
| 88 | MUC16_RYR1 | 0.562 | 1.36 | 12 | 11 |
| 89 | APC_MEGF8 | 0.562 | 1.36 | 14 | 9 |
| 90 | OBSCN_RYR1 | 0.562 | 1.36 | 12 | 11 |
| 91 | APC_OBSCN | 0.563 | 1.37 | 15 | 8 |
| 92 | APC_CIT | 0.563 | 1.37 | 15 | 8 |
| 93 | MEGF8_CIT | 0.563 | 1.37 | 15 | 8 |
| 94 | ADGRV1_DST | 0.577 | 0.752 | 16 | 7 |
| 95 | ADGRV1_CTNND2 | 0.577 | 0.752 | 16 | 7 |
| 96 | MUC19_DST | 0.577 | 0.752 | 16 | 7 |
| 97 | MUC19_CTNND2 | 0.577 | 0.752 | 16 | 7 |
| 98 | SYNE2_CTNND2 | 0.577 | 0.752 | 16 | 7 |
| 99 | MEGF8_CTNND2 | 0.577 | 0.752 | 16 | 7 |
| 100 | TTN_LRP1B | 0.59 | 0.758 | 15 | 8 |
| 101 | MUC16_LRP1B | 0.59 | 0.758 | 15 | 8 |
| 102 | OBSCN_LRP1B | 0.59 | 0.758 | 15 | 8 |
| 103 | RYR1_LRP1B | 0.59 | 0.758 | 15 | 8 |
| 104 | SYNE2_MUC17 | 0.59 | 0.758 | 15 | 8 |
| 105 | SYNE2_LRP1B | 0.59 | 0.758 | 15 | 8 |
| 106 | HMCN1_CIT | 0.59 | 1.33 | 15 | 8 |
| 107 | DNAH5_ADGRV1 | 0.593 | 1.33 | 14 | 9 |
| 108 | DNAH5_MUC19 | 0.593 | 1.33 | 14 | 9 |
| 109 | FAT4_MEGF8 | 0.6 | 0.762 | 14 | 9 |
| 110 | FAT4_LRP1B | 0.6 | 0.762 | 14 | 9 |
| 111 | MEGF8_LRP1B | 0.6 | 0.762 | 14 | 9 |
| 112 | MUC17_ANK3 | 0.619 | 0.769 | 16 | 7 |
| 113 | TTN_SYNE1 | 0.622 | 0.776 | 15 | 8 |
| 114 | MUC16_SYNE1 | 0.622 | 0.776 | 15 | 8 |
| 115 | OBSCN_SYNE1 | 0.622 | 0.776 | 15 | 8 |
| 116 | FAT4_ADGRV1 | 0.622 | 0.776 | 15 | 8 |
| 117 | FAT4_MUC19 | 0.622 | 0.776 | 15 | 8 |
| 118 | RYR1_SYNE1 | 0.622 | 0.776 | 15 | 8 |
| 119 | RYR1_DNAH11 | 0.622 | 0.776 | 15 | 8 |
| 120 | SYNE1_ADGRV1 | 0.622 | 0.776 | 15 | 8 |
| 121 | SYNE1_MUC19 | 0.622 | 0.776 | 15 | 8 |
| 122 | SYNE1_SYNE2 | 0.622 | 0.776 | 15 | 8 |
| 123 | SYNE1_DNAH11 | 0.622 | 0.776 | 15 | 8 |
| 124 | SYNE1_RYR3 | 0.622 | 0.776 | 15 | 8 |
| 125 | ADGRV1_PCLO | 0.622 | 0.776 | 15 | 8 |
| 126 | MUC19_PCLO | 0.622 | 0.776 | 15 | 8 |
| 127 | SYNE2_DNAH11 | 0.622 | 0.776 | 15 | 8 |
| 128 | SYNE2_RYR3 | 0.622 | 0.776 | 15 | 8 |
| 129 | SYNE2_PCLO | 0.622 | 0.776 | 15 | 8 |
| 130 | DST_DYNC2H1 | 0.629 | 1.32 | 16 | 7 |
| 131 | CTNND2_DYNC2H1 | 0.629 | 1.32 | 16 | 7 |
| 132 | SYNE1_DYNC2H1 | 0.632 | 0.765 | 18 | 5 |
| 133 | SYNE2_CIT | 0.634 | 1.29 | 15 | 8 |
| 134 | RYR3_ANK3 | 0.651 | 0.788 | 16 | 7 |
| 135 | RYR3_DYNC2H1 | 0.659 | 1.28 | 16 | 7 |
| 136 | APC_PCLO | 0.66 | 0.79 | 18 | 5 |
| 137 | HMCN1_CTNND2 | 0.66 | 0.79 | 18 | 5 |
| 138 | LRP1B_DYNC2H1 | 0.66 | 0.79 | 18 | 5 |
| 139 | APC_TNRC18 | 0.666 | 0.785 | 17 | 6 |
| 140 | TNRC18_NEB | 0.666 | 1.29 | 16 | 7 |
| 141 | SYNE1_DNAH5 | 0.67 | 1.26 | 17 | 6 |
| 142 | TNRC18_HMCN1 | 0.672 | 1.25 | 17 | 6 |
| 143 | FAT4_TNRC18 | 0.678 | 1.24 | 15 | 8 |
| 144 | MUC17_CTNND2 | 0.678 | 0.812 | 16 | 7 |
| 145 | DST_RYR3 | 0.678 | 0.812 | 16 | 7 |
| 146 | DST_PCLO | 0.678 | 0.812 | 16 | 7 |
| 147 | RYR3_CTNND2 | 0.678 | 0.812 | 16 | 7 |
| 148 | CTNND2_CIT | 0.678 | 1.27 | 16 | 7 |
| 149 | CTNND2_PCLO | 0.678 | 0.812 | 16 | 7 |
| 150 | CTNND2_ANK3 | 0.678 | 0.812 | 16 | 7 |
| 151 | HMCN1_LRP1B | 0.681 | 0.803 | 17 | 6 |
| 152 | ADGRV1_MUC17 | 0.693 | 0.823 | 15 | 8 |
| 153 | MUC19_MUC17 | 0.693 | 0.823 | 15 | 8 |
| 154 | MUC17_DNAH11 | 0.693 | 0.823 | 15 | 8 |
| 155 | MEGF8_DNAH11 | 0.693 | 0.823 | 15 | 8 |
| 156 | MEGF8_RYR3 | 0.693 | 0.823 | 15 | 8 |
| 157 | TTN_HMCN1 | 0.695 | 1.23 | 13 | 10 |
| 158 | TTN_RYR3 | 0.699 | 1.23 | 13 | 10 |
| 159 | MUC16_RYR3 | 0.699 | 1.23 | 13 | 10 |
| 160 | OBSCN_RYR3 | 0.699 | 1.23 | 13 | 10 |
| 161 | FAT4_MUC17 | 0.704 | 0.82 | 14 | 9 |
| 162 | TNRC18_DST | 0.704 | 1.25 | 16 | 7 |
| 163 | RYR1_DYNC2H1 | 0.708 | 1.23 | 16 | 7 |
| 164 | CIT_PCLO | 0.708 | 1.23 | 16 | 7 |
| 165 | PCLO_DYNC2H1 | 0.708 | 1.23 | 16 | 7 |
| 166 | ANK3_DYNC2H1 | 0.708 | 1.23 | 16 | 7 |
| 167 | ADGRV1_HMCN1 | 0.71 | 1.22 | 15 | 8 |
| 168 | MUC19_HMCN1 | 0.71 | 1.22 | 15 | 8 |
| 169 | DNAH11_HMCN1 | 0.71 | 1.22 | 15 | 8 |
| 170 | RYR3_HMCN1 | 0.71 | 1.22 | 15 | 8 |
| 171 | TNRC18_DNAH11 | 0.714 | 0.805 | 17 | 6 |
| 172 | HMCN1_PCLO | 0.714 | 0.823 | 17 | 6 |
| 173 | MUC16_ADGRV1 | 0.718 | 0.84 | 12 | 11 |
| 174 | MUC16_MUC19 | 0.718 | 0.84 | 12 | 11 |
| 175 | ADGRV1_MUC19 | 0.718 | 0.84 | 12 | 11 |
| 176 | TTN_RYR1 | 0.725 | 1.21 | 11 | 12 |
| 177 | FAT4_RYR3 | 0.726 | 0.834 | 15 | 8 |
| 178 | RYR3_PCLO | 0.726 | 0.834 | 15 | 8 |
| 179 | RYR1_TNRC18 | 0.727 | 1.2 | 15 | 8 |
| 180 | TTN_APC | 0.731 | 1.21 | 14 | 9 |
| 181 | TTN_MUC17 | 0.732 | 1.21 | 13 | 10 |
| 182 | MUC16_MUC17 | 0.732 | 1.21 | 13 | 10 |
| 183 | OBSCN_MUC17 | 0.732 | 1.21 | 13 | 10 |
| 184 | MUC16_CTNND2 | 0.737 | 1.22 | 14 | 9 |
| 185 | DST_CTNND2 | 0.737 | 1.22 | 14 | 9 |
| 186 | SYNE2_ANK3 | 0.74 | 0.845 | 15 | 8 |
| 187 | APC_NEB | 0.743 | 1.22 | 16 | 7 |
| 188 | MUC17_HMCN1 | 0.743 | 1.19 | 15 | 8 |
| 189 | MEGF8_HMCN1 | 0.743 | 1.19 | 15 | 8 |
| 190 | RYR3_NEB | 0.766 | 1.19 | 14 | 9 |
| 191 | SYNE2_DST | 0.769 | 0.87 | 15 | 8 |
| 192 | MEGF8_DST | 0.769 | 0.87 | 15 | 8 |
| 193 | ADGRV1_DYNC2H1 | 0.773 | 1.18 | 16 | 7 |
| 194 | MUC19_DYNC2H1 | 0.773 | 1.18 | 16 | 7 |
| 195 | DNAH11_CIT | 0.773 | 1.18 | 16 | 7 |
| 196 | HMCN1_NEB | 0.773 | 1.18 | 16 | 7 |
| 197 | TNRC18_PCLO | 0.779 | 0.845 | 17 | 6 |
| 198 | APC_ADGRV1 | 0.783 | 0.887 | 15 | 8 |
| 199 | APC_MUC19 | 0.783 | 0.887 | 15 | 8 |
| 200 | APC_MUC17 | 0.801 | 1.15 | 15 | 8 |
| 201 | FAT4_DST | 0.801 | 1.16 | 14 | 9 |
| 202 | SYNE2_NEB | 0.803 | 0.89 | 15 | 8 |
| 203 | TTN_ADGRV1 | 0.808 | 1.15 | 13 | 10 |
| 204 | TTN_MUC19 | 0.808 | 1.15 | 13 | 10 |
| 205 | OBSCN_FAT4 | 0.808 | 1.14 | 13 | 10 |
| 206 | OBSCN_ADGRV1 | 0.808 | 1.15 | 13 | 10 |
| 207 | OBSCN_MUC19 | 0.808 | 1.15 | 13 | 10 |
| 208 | FAT4_RYR1 | 0.808 | 1.14 | 13 | 10 |
| 209 | FAT4_SYNE2 | 0.812 | 0.885 | 14 | 9 |
| 210 | RYR1_NEB | 0.815 | 1.15 | 14 | 9 |
| 211 | HMCN1_ANK3 | 0.839 | 0.9 | 17 | 6 |
| 212 | RYR1_MEGF8 | 0.842 | 0.91 | 14 | 9 |
| 213 | SYNE2_MEGF8 | 0.842 | 0.91 | 14 | 9 |
| 214 | TTN_MEGF8 | 0.843 | 1.12 | 13 | 10 |
| 215 | MUC16_MEGF8 | 0.843 | 1.12 | 13 | 10 |
| 216 | OBSCN_MEGF8 | 0.843 | 1.12 | 13 | 10 |
| 217 | OBSCN_DST | 0.85 | 1.12 | 14 | 9 |
| 218 | RYR1_DST | 0.85 | 1.12 | 14 | 9 |
| 219 | DNAH11_NEB | 0.851 | 0.919 | 15 | 8 |
| 220 | APC_DST | 0.858 | 1.12 | 16 | 7 |
| 221 | APC_ANK3 | 0.869 | 0.927 | 17 | 6 |
| 222 | DST_HMCN1 | 0.869 | 0.927 | 17 | 6 |
| 223 | CIT_LRP1B | 0.869 | 0.927 | 17 | 6 |
| 224 | RYR1_ADGRV1 | 0.877 | 0.931 | 14 | 9 |
| 225 | RYR1_MUC19 | 0.877 | 0.931 | 14 | 9 |
| 226 | ADGRV1_SYNE2 | 0.877 | 0.931 | 14 | 9 |
| 227 | MUC19_SYNE2 | 0.877 | 0.931 | 14 | 9 |
| 228 | SYNE2_TNRC18 | 0.878 | 0.913 | 16 | 7 |
| 229 | TNRC18_RYR3 | 0.878 | 1.09 | 16 | 7 |
| 230 | TTN_ANK3 | 0.879 | 1.09 | 14 | 9 |
| 231 | MUC16_ANK3 | 0.879 | 1.09 | 14 | 9 |
| 232 | OBSCN_ANK3 | 0.879 | 1.09 | 14 | 9 |
| 233 | FAT4_ANK3 | 0.879 | 1.09 | 14 | 9 |
| 234 | RYR1_ANK3 | 0.879 | 1.09 | 14 | 9 |
| 235 | ADGRV1_NEB | 0.88 | 1.1 | 14 | 9 |
| 236 | MUC19_NEB | 0.88 | 1.1 | 14 | 9 |
| 237 | MUC17_DST | 0.881 | 0.937 | 15 | 8 |
| 238 | MEGF8_NEB | 0.881 | 0.946 | 15 | 8 |
| 239 | DST_ANK3 | 0.881 | 0.937 | 15 | 8 |
| 240 | APC_FAT4 | 0.887 | 0.936 | 16 | 7 |
| 241 | APC_LRP1B | 0.887 | 0.936 | 16 | 7 |
| 242 | TTN_CTNND2 | 0.888 | 1.1 | 13 | 10 |
| 243 | MUC17_DYNC2H1 | 0.892 | 1.1 | 17 | 6 |
| 244 | TTN_SYNE2 | 0.895 | 0.938 | 12 | 11 |
| 245 | RYR1_SYNE2 | 0.895 | 0.938 | 12 | 11 |
| 246 | MUC17_MEGF8 | 0.903 | 0.943 | 13 | 10 |
| 247 | SYNE1_CIT | 0.904 | 0.949 | 17 | 6 |
| 248 | DNAH5_LRP1B | 0.904 | 1.08 | 18 | 5 |
| 249 | SYNE2_DYNC2H1 | 0.904 | 0.949 | 17 | 6 |
| 250 | FAT4_HMCN1 | 0.916 | 0.946 | 16 | 7 |
| 251 | FAT4_NEB | 0.916 | 0.959 | 15 | 8 |
| 252 | MUC17_TNRC18 | 0.916 | 1.06 | 16 | 7 |
| 253 | TNRC18_ANK3 | 0.916 | 0.938 | 17 | 6 |
| 254 | NEB_PCLO | 0.916 | 0.959 | 15 | 8 |
| 255 | NEB_ANK3 | 0.916 | 0.959 | 15 | 8 |
| 256 | PCLO_ANK3 | 0.916 | 0.959 | 15 | 8 |
| 257 | TNRC18_CTNND2 | 0.919 | 1.08 | 17 | 6 |
| 258 | MUC16_SYNE2 | 0.921 | 1.06 | 13 | 10 |
| 259 | OBSCN_SYNE2 | 0.921 | 1.06 | 13 | 10 |
| 260 | TTN_DNAH11 | 0.926 | 0.961 | 14 | 9 |
| 261 | MUC16_DNAH11 | 0.926 | 0.961 | 14 | 9 |
| 262 | OBSCN_DNAH11 | 0.926 | 0.961 | 14 | 9 |
| 263 | ADGRV1_DNAH11 | 0.926 | 0.961 | 14 | 9 |
| 264 | ADGRV1_RYR3 | 0.926 | 0.961 | 14 | 9 |
| 265 | MUC19_DNAH11 | 0.926 | 0.961 | 14 | 9 |
| 266 | MUC19_RYR3 | 0.926 | 0.961 | 14 | 9 |
| 267 | DNAH11_RYR3 | 0.926 | 0.961 | 14 | 9 |
| 268 | MUC17_RYR3 | 0.929 | 1.06 | 14 | 9 |
| 269 | APC_CTNND2 | 0.935 | 0.978 | 17 | 6 |
| 270 | OBSCN_CTNND2 | 0.947 | 0.987 | 15 | 8 |
| 271 | RYR1_CTNND2 | 0.947 | 0.987 | 15 | 8 |
| 272 | DST_NEB | 0.947 | 0.987 | 15 | 8 |
| 273 | NEB_CTNND2 | 0.947 | 0.987 | 15 | 8 |
| 274 | DNAH11_DYNC2H1 | 0.955 | 0.983 | 17 | 6 |
| 275 | HMCN1_DYNC2H1 | 0.955 | 0.983 | 17 | 6 |
| 276 | RYR1_MUC17 | 0.956 | 0.98 | 14 | 9 |
| 277 | ADGRV1_MEGF8 | 0.956 | 0.988 | 14 | 9 |
| 278 | MUC19_MEGF8 | 0.956 | 0.988 | 14 | 9 |
| 279 | APC_RYR1 | 0.957 | 0.988 | 15 | 8 |
| 280 | APC_SYNE2 | 0.957 | 0.988 | 15 | 8 |
| 281 | TNRC18_MEGF8 | 0.961 | 0.975 | 16 | 7 |
| 282 | MUC16_APC | 0.98 | 1.01 | 14 | 9 |
| 283 | SYNE1_HMCN1 | 0.981 | 0.994 | 16 | 7 |
| 284 | APC_DNAH11 | 0.987 | 1.01 | 17 | 6 |
| 285 | APC_RYR3 | 0.987 | 1.01 | 17 | 6 |
| 286 | APC_DYNC2H1 | 0.987 | 1.01 | 17 | 6 |
| 287 | MEGF8_DYNC2H1 | 0.987 | 1.01 | 17 | 6 |
| 288 | TTN_PCLO | 0.991 | 1 | 14 | 9 |
| 289 | MUC16_PCLO | 0.991 | 1 | 14 | 9 |
| 290 | OBSCN_PCLO | 0.991 | 1 | 14 | 9 |
| 291 | FAT4_PCLO | 0.991 | 1 | 14 | 9 |
| 292 | RYR1_RYR3 | 0.991 | 1 | 14 | 9 |
| 293 | RYR1_PCLO | 0.991 | 1 | 14 | 9 |
| 294 | APC_HMCN1 | 0.993 | 1.02 | 15 | 8 |
| 295 | FAT4_CTNND2 | 0.997 | 1.02 | 15 | 8 |
| 296 | MUC17_NEB | 0.997 | 1.02 | 15 | 8 |
| 297 | ADGRV1_TNRC18 | 0.998 | 1 | 16 | 7 |
| 298 | MUC19_TNRC18 | 0.998 | 1 | 16 | 7 |
| 299 | RYR1_HMCN1 | 1 | 1 | 14 | 9 |
| 300 | SYNE2_HMCN1 | 1 | 1 | 14 | 9 |
