# Supplementary material for: Integrated clinicopathological and mutational profiling accumulates histological characteristics of rare and conventional colorectal cancer in Indian patients
Source: Research Square preprint supplement (doi:10.21203/rs.3.rs-6349107/v1), 2025-05-14
Supplement: Supplementary file 4 [file b0a83544042d23a368f99fc7.docx]

Supplementary Table 3: Factors affecting Overall survival in colorectal cancer

| **S. NO.** | **Parameters** | **N=32**  **Event=Death** | **Mean Survival** | **1-year survival** | **3-year survival** | **95%CI** | ***p-* value** |
| --- | --- | --- | --- | --- | --- | --- | --- |
| **1** | **Age**  <40 (11) >40 (21) | 05  03 | 37.2  53.9 | 90.0  94.4 | 68.6  80.5 | 27.5-46.8  45.7-62.1 | *0.108* |
| **2** | **Gender**  Male (21) Female (11) | 04  04 | 42.8  44.6 | 94.7  77.8 | 81.1  66.7 | 36.0-49.5  31.7-57.5 | *0.520* |
| **3** | **Site**  Colon (26)  Rectum (6) | 04  04 | 52.4  29.4 | 96.0  80.0 | 85.9  20.0 | 44.3-60.5  17.9-40.8 | ***0.019*** |
| **4** | **Location**  Left colon +Rectum (9)  Right colon (23) | 06  02 | 29.1  55.6 | 87.5  95.0 | 18.8  63.3 | 20.0-38.3  47.9-63.2 | ***0.001*** |
| **5** | **LVI**  Present (6)  Absent (26) | 02  06 | 44.7  42.7 | 83.3  90.9 | 55.6  81.3 | 26.2-63.2  36.9-48.5 | *0.612* |
| **6** | **PNI**  Present (4)  Absent (28) | 01  07 | 30.7  47.4 | 75.0  91.3 | 75.0  75.8 | 21.8-39.6  38.9-55.8 | *0.833* |
| **7** | **LN Metastasis**  Positive (11)  Negative (21) | 05  03 | 33.2  53.1 | 77.8  94.7 | 41.7  94.7 | 23.0-41.4  44.8-61.5 | ***0.011*** |
| **8** | **Depth of Invasion**  T1 (1)  T2 (4)  T3 (22)  T4 (5) | 00  00  06  02 | --  --  --  -- | --  --  94.7  75.0 | --  --  76.3  50.0 | --  --  --  -- | *0.295* |
| **9** | **TNM Stage**  I (4)  II (16)  III (11)  IV (1) | 00  02  06  00 | --  --  --  -- | --  92.9  80.0  -- | --  92.9  45.0  -- | --  --  --  -- | ***0.027*** |
| **10** | **Grade of differentiation**  Well (7) Moderate (20) Poor (5) | 01  05  02 | 27.8  27.8  34.2 | 83.3  94.4  80.0 | --  73.2  80.0 | 23.9-31.7  39.2-58.1  24.7-43.6 | *0.778* |
| **11** | **Histological subtypes**  MAC (06)  SRCC (06)  MSS-CoAD (11)  MSI-CoAD (09) | 02  02  03  01 | 44.8  34.5  38.0  53.5 | 83.3  83.3  88.9  75.0 | 41.7  0.0  66.7  75.0 | 35.5-54.1  25.6-43.3  28.6-47.3  39.0-67.9 | *0.642* |
| **12** | **MMR expression**  **(IHC)**  pMMR (15)  dMMR (15)  NA (2) | 04  03  01 | 38.6  51.6  31.5 | 88.9  92.3  50.0 | 71.1  68.4  50.0 | 42.3-60.9  30.9-46.2  11.4-51.5 | *0.401* |
| **13** | **MSI Score**  MSS (18)  MSI (14) | 05  03 | 40.6  49.5 | 93.3  91.7 | 72.7  60.2 | 32.7-48.9  38.0-61.0 | *0.400* |
| **14** | **TMB**  Low (<17) (14)  High (>17) (18) | 06  02 | 35.7  54.2 | 91.7  90.0 | 57.1  72.0 | 26.0-45.4  44.9-63.5 | ***0.020*** |
