# Supplementary material for: Integrated clinicopathological and mutational profiling accumulates histological characteristics of rare and conventional colorectal cancer in Indian patients
Source: Research Square preprint supplement (doi:10.21203/rs.3.rs-6349107/v1), 2025-05-14
Supplement: Supplementary file 5 [file d3e20f824170198f0ae1c713.docx]

Supplementary Table 1: Microsatellite stability status based on IHC and NGS report

| **S.No.** | **Samples** | **MMR protein expression on IHC** | **MSI Status by IHC** | **MSI Score** | **MSI Status by MSI-Sensor** |
| --- | --- | --- | --- | --- | --- |
| **MAC** | | | | |  |
| 1 | 55_CRC | Loss of MSH2 and MSH6  Retained MLH1 and PMS2. | dMMR | 0.16 | MSS |
| 2 | 62_CRC | Loss of MSH2 and MSH6. Retained PMS2 | dMMR | 11.95 | MSI |
| 3 | 71_CRC | NA | - | 1.76 | MSS |
| 4 | 81_CRC | MLH1, MSH2, MSH6 and PMS2 retained | pMMR | 0.73 | MSS |
| 5 | 132_CRC | Loss of PMS2 and MLH1.Retained MSH2 and MSH6 | dMMR | 23.27 | MSI |
| 6 | 136_CRC | MSH2 MSH6 MLH1 PMS2 retained | pMMR | 0.23 | MSS |
| **SRCC** | | | | |  |
| 7 | 63_CRC | NA | - | 5.95 | MSI |
| 8 | 96_CRC | Loss of PMS2 and MLH1 and retained MSH2 and MSH6 | dMMR | 30.12 | MSI |
| 9 | 101_CRC | Retained MLH1, MSH2, and MSH6 | pMMR | 27.46 | MSI |
| 10 | 114_CRC | Loss of MLH1 and MSH2. Retained MSH6 | dMMR | 1.55 | MSS |
| 11 | 128_CRC | MLH1, MSH2 MSH6 and PMS2 retained | pMMR | 0.26 | MSS |
| 12 | 153_CRC | Loss of MLH1. Retained MSH2, and MSH6 | dMMR | 28.1 | MSI |
| **CoAD** | | | | | |
| 13 | 67_CRC | Retained MLH1, MSH2, PMS2and MSH6 | pMMR | 1.9 | MSS |
| 14 | 99_CRC | Retained MLH1, MSH2, PMS2and MSH6 | pMMR | 1.8 | MSS |
| 15 | 115_CRC | Retained MLH1, MSH2, and MSH6 | pMMR | 3.01 | MSS |
| 16 | 120_CRC | Retained MLH1, MSH2, and MSH6 | pMMR | 0.24 | MSS |
| 17 | 127_CRC | Retained MLH1, MSH2, PMS2 and MSH6 | pMMR | 1.23 | MSS |
| 18 | 129_CRC | Retained MLH1, MSH2, PMS2 and MSH6 | pMMR | 1.34 | MSS |
| 19 | 130_CRC | Retained MLH1, MSH2, PMS2 and MSH6 | pMMR | 1.65 | MSS |
| 20 | 140_CRC | Retained MLH1, MSH2, PMS2 and MSH6 | pMMR | 0.94 | MSS |
| 21 | 152_CRC | Retained MLH1, MSH2, and MSH6 | pMMR | 1.89 | MSS |
| 22 | 162_CRC | Retained MLH1, MSH2, and MSH6 | pMMR | 0.45 | MSS |
| 23 | 168_CRC | Retained MLH1, MSH2, PMS2 and MSH6 | pMMR | 0.83 | MSS |
| 24 | 169_CRC | Retained MLH1, MSH2, PMS2 and MSH6 | pMMR | 0.41 | MSS |
| 25 | 50_CRC | Loss of MSH2 and MSH6. MLH1 and PMS2 intact | dMMR | 6.2 | MSI |
| 26 | 91_CRC | Loss of MSH2 and MSH6, retained MLH1 and PMS2 | dMMR | 30.45 | MSI |
| 27 | 118_CRC | Loss of MSH2, MSH6. Retained expression of MLH1 | dMMR | 20.4 | MSI |
| 28 | 122_CRC | Loss of MLH1. MSH6, MSH2 Retained | dMMR | 15.03 | MSI |
| 29 | 124_CRC | Loss of MLH1. MSH6, MSH2 Retained | dMMR | 19.33 | MSI |
| 30 | 143_CRC | Loss of PMS2 and MLH1. Retained MSH2, MSH6 | dMMR | 19.22 | MSI |
| 31 | 149_CRC | Loss of PMS2 and MLH1. Retained MSH2, MSH6 | dMMR | 7.21 | MSI |
| 32 | 159_CRC | Lost PMS2 and MLH1. Retained MSH2, MSH6 | dMMR | 1.78 | MSS |
| 33 | 166_CRC | Loss of MSH2, MSH6 and MLH1. Retained expression of PMS2 | dMMR | 1.04 | MSS |
| 34 | 187T1_CRC | Loss of MSH2 and MSH6. Retained ML1 and PMS2 | dMMR | 7.22 | MSI |
| 35 | 187T2_CRC | Loss of MSH2 and MSH6. Retained ML1 and PMS2 | dMMR | 18.63 | MSI |
